# Supplementary material for: Supplementation with nicotinamide limits accelerated aging in affected individuals with cockayne syndrome and restores antioxidant defenses
Source: PubMed Central journal article supplement (PMC11719109; doi:10.18632/aging.206160), 2024-11-26
Supplement: aging-16-206160-s001.pdf [file aging-16-206160-s001.pdf]

## SUPPLEMENTARY FIGURE

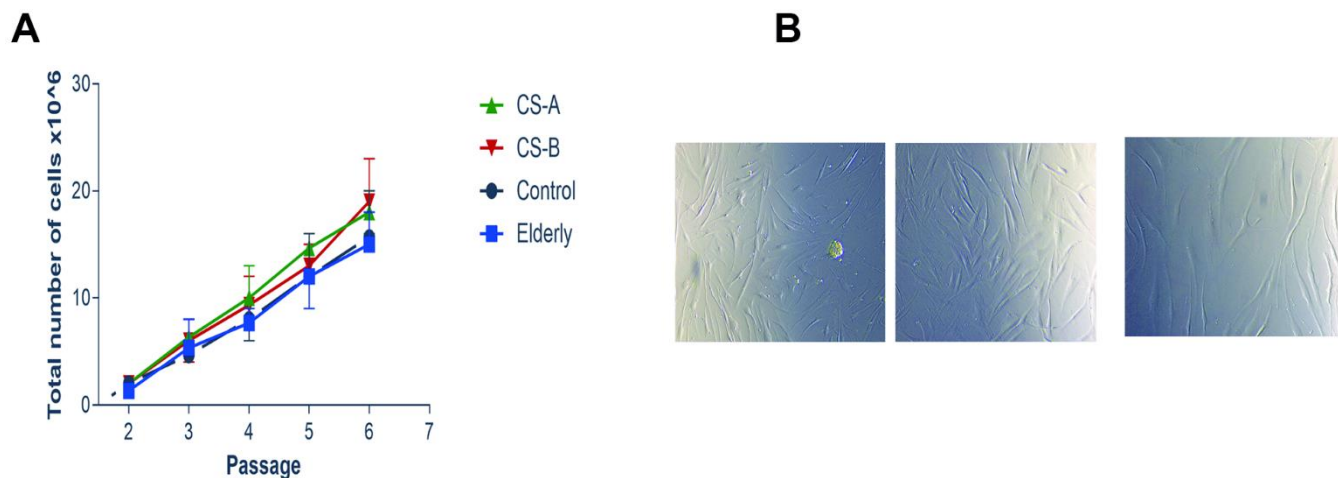

**Supplementary Figure 1.** CS fibroblasts and morphology (A) Skin fibroblasts' proliferation rate. Absolute number of cells from passage 2 to 6 ( $n = 3$ ). Proliferation was almost similar for CS, elderly, and Healthy donors. (B) Morphology of skin fibroblasts of healthy donors and CS-affected individual. Cells were subjected to light microscopy and photographed. A representative image is shown.
